# Supplementary material for: Unveiling the Effect of NCgl0580 Gene Deletion on 5-Aminolevulinic Acid Biosynthesis in Corynebacterium glutamicum
Source: MDPI journal article supplement (doi:10.3390/fermentation9030213), 2023-02-23
Supplement: s1 [file s1]

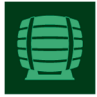

# Unveiling the Effect of *NCgl0580* Gene Deletion on 5-Aminolevulinic Acid Biosynthesis in *Corynebacterium glutamicum*

Table S1. Strains and plasmids used in this study.

| Strains/Plasmids            | Description                                                                                                                                                                | Source     |
|-----------------------------|----------------------------------------------------------------------------------------------------------------------------------------------------------------------------|------------|
| Strains                     |                                                                                                                                                                            |            |
| <i>E. coli</i> DH5 $\alpha$ | Host for plasmid construction                                                                                                                                              | Lab stock  |
| J0                          | <i>C. glutamicum</i> ATCC13032 $\Delta$ <i>ldhA</i> $\Delta$ <i>pqo</i> $\Delta$ <i>cat</i> $\Delta$ <i>pta</i> $\Delta$ <i>ackA</i> $\Delta$ <i>pck</i> <i>Pppc::Psod</i> | Lab stock  |
| JT                          | J0 harboring pXPT                                                                                                                                                          | This study |
| JS                          | J0 harboring pXPS                                                                                                                                                          | This study |
| JP                          | J0 harboring pXPP                                                                                                                                                          | This study |
| JG                          | J0 harboring pXPG                                                                                                                                                          | This study |
| JSC                         | JS harboring pEC-XK99E                                                                                                                                                     | This study |
| JSC1                        | JS harboring pEC-NCgl0580                                                                                                                                                  | This study |
| JSC2                        | JS harboring pEC-NCgl2065                                                                                                                                                  | This study |
| JSD1                        | JS $\Delta$ NCgl0580                                                                                                                                                       | This study |
| JSD1C                       | JS $\Delta$ NCgl0580 harboring pEC-XK99E                                                                                                                                   | This study |
| JSD1C1                      | JS $\Delta$ NCgl0580 harboring pEC-NCgl0580                                                                                                                                | This study |
| JSD2                        | JS $\Delta$ NCgl2065                                                                                                                                                       | This study |
| JSD3                        | JS derivative with the insertion of three termination codon TAA before 10th, 18th and 27th amino acids of <i>NCgl0580</i>                                                  | This study |
| JSD4                        | JS $\Delta$ NCgl0581                                                                                                                                                       | This study |
| JSD5                        | JS $\Delta$ NCgl0580 $\Delta$ NCgl0581                                                                                                                                     | This study |
| JSC3                        | JS harboring pEC-NCgl0581                                                                                                                                                  | This study |
| JSCZ1                       | JS harboring pEC-NCgl1445                                                                                                                                                  | This study |
| JSCZ2                       | JS harboring pEC- <i>iolT1</i>                                                                                                                                             | This study |
| JSCZ3                       | JS harboring pEC- <i>pyk2</i>                                                                                                                                              | This study |
| JSCZ4                       | JS harboring pEC- <i>aceA</i>                                                                                                                                              | This study |
| JSCZ5                       | JS harboring pEC- <i>afuABC</i>                                                                                                                                            | This study |
| JSCZ6                       | JS harboring pEC- <i>pstSCAB</i>                                                                                                                                           | This study |
| JSCZ7                       | JS harboring pEC- <i>ugpQ</i>                                                                                                                                              | This study |
| JSDZ1                       | JS $\Delta$ <i>sdhCAB</i>                                                                                                                                                  | This study |
| JSDZ2                       | JS $\Delta$ <i>gdhA</i>                                                                                                                                                    | This study |
| DZ1C                        | JS $\Delta$ <i>sdhCAB</i> harboring pEC-XK99E                                                                                                                              | This study |
| DZ1C1                       | JS $\Delta$ <i>sdhCAB</i> harboring pEC-NCgl1445                                                                                                                           | This study |
| DZ1C2                       | JS $\Delta$ <i>sdhCAB</i> harboring pEC- <i>iolT1</i>                                                                                                                      | This study |
| DZ1C3                       | JS $\Delta$ <i>sdhCAB</i> harboring pEC- <i>pyk2</i>                                                                                                                       | This study |
| DZ1C4                       | JS $\Delta$ <i>sdhCAB</i> harboring pEC- <i>aceA</i>                                                                                                                       | This study |
| DZ1C5                       | JS $\Delta$ <i>sdhCAB</i> harboring pEC- <i>afuABC</i>                                                                                                                     | This study |
| DZ1C6                       | JS $\Delta$ <i>sdhCAB</i> harboring pEC- <i>pstSCAB</i>                                                                                                                    | This study |
| DZ1C7                       | JS $\Delta$ <i>sdhCAB</i> harboring pEC- <i>ugpQ</i>                                                                                                                       | This study |
| DZ2C                        | JS $\Delta$ <i>gdhA</i> harboring pEC-XK99E                                                                                                                                | This study |
| DZ2C1                       | JS $\Delta$ <i>gdhA</i> harboring pEC-NCgl1445                                                                                                                             | This study |
| DZ2C2                       | JS $\Delta$ <i>gdhA</i> harboring pEC- <i>iolT1</i>                                                                                                                        | This study |
| DZ2C3                       | JS $\Delta$ <i>gdhA</i> harboring pEC- <i>pyk2</i>                                                                                                                         | This study |
| DZ2C4                       | JS $\Delta$ <i>gdhA</i> harboring pEC- <i>aceA</i>                                                                                                                         | This study |
| DZ2C5                       | JS $\Delta$ <i>gdhA</i> harboring pEC- <i>afuABC</i>                                                                                                                       | This study |
| DZ2C6                       | JS $\Delta$ <i>gdhA</i> harboring pEC- <i>pstSCAB</i>                                                                                                                      | This study |
| DZ2C7                       | JS $\Delta$ <i>gdhA</i> harboring pEC- <i>ugpQ</i>                                                                                                                         | This study |

|                     |                                                                                                                                                                           |            |
|---------------------|---------------------------------------------------------------------------------------------------------------------------------------------------------------------------|------------|
| Plasmids            |                                                                                                                                                                           |            |
| pXMJ19              | Cm <sup>r</sup> , <i>C. glutamicum</i> /E. coli shuttle vector                                                                                                            | Lab stock  |
| pXK                 | Derived from pXMJ19, deletion of <i>tac</i> promoter and <i>lacIq</i>                                                                                                     | Lab stock  |
| pXPS                | Derived from pXK, carrying <i>hemA</i> from <i>Rhodobacter palustris</i> with amino acid sequence mutation C75A/R365K under the control of <i>sod</i> (C131T) promoter    | This study |
| pXPT                | Derived from pXK, carrying <i>hemA</i> from <i>Rhodobacter palustris</i> with amino acid sequence mutation C75A/R365K under the control of <i>tuf</i> promoter            | This study |
| pXPP                | Derived from pXK, carrying <i>hemA</i> from <i>Rhodobacter palustris</i> with amino acid sequence mutation C75A/R365K under the control of <i>pgk</i> promoter            | This study |
| pXPG                | Derived from pXK, carrying <i>hemA</i> from <i>Rhodobacter palustris</i> with amino acid sequence mutation C75A/R365K under the control of <i>glyA</i> promoter           | This study |
| pEC-XK99E           | Kan <sup>r</sup> ; <i>C. glutamicum</i> /E. coli shuttle vector                                                                                                           | Lab stock  |
| pEC-NCgl0580        | Derived from pEC-XK99E, for overexpression of <i>NCgl0580</i>                                                                                                             | This study |
| pEC-NCgl2065        | Derived from pEC-XK99E, for overexpression of <i>NCgl2065</i>                                                                                                             | This study |
| pEC-NCgl0581        | Derived from pEC-XK99E, for overexpression of <i>NCgl0581</i>                                                                                                             | This study |
| pEC-NCgl1445        | Derived from pEC-XK99E, for overexpression of <i>NCgl1445</i>                                                                                                             | This study |
| pEC- <i>iolT1</i>   | Derived from pEC-XK99E, for overexpression of <i>iolT1</i>                                                                                                                | This study |
| pEC- <i>pyk2</i>    | Derived from pEC-XK99E, for overexpression of <i>pyk2</i>                                                                                                                 | This study |
| pEC- <i>aceA</i>    | Derived from pEC-XK99E, for overexpression of <i>aceA</i>                                                                                                                 | This study |
| pEC- <i>afuABC</i>  | Derived from pEC-XK99E, for overexpression of <i>afuABC</i>                                                                                                               | This study |
| pEC- <i>pstSCAB</i> | Derived from pEC-XK99E, for overexpression of <i>pstSCAB</i>                                                                                                              | This study |
| pEC- <i>ugpQ</i>    | Derived from pEC-XK99E, for overexpression of <i>ugpQ</i>                                                                                                                 | This study |
| pD-SacB             | Kan <sup>r</sup> ; vector for gene deletion                                                                                                                               | Lab stock  |
| pD-NCgl0580         | pD-SacB containing upstream and downstream of gene <i>NCgl0580</i>                                                                                                        | This study |
| pD-NCgl0581         | pD-SacB containing upstream and downstream of gene <i>NCgl0581</i>                                                                                                        | This study |
| pD-NCgl0580TAA      | pD-SacB containing upstream and downstream of gene <i>NCgl0580</i> and insertion of three termination codon TAA before 10th, 18th and 27th amino acids of <i>NCgl0580</i> | This study |
| pD- <i>gdhA</i>     | pD-SacB containing upstream and downstream of gene <i>gdhA</i>                                                                                                            | This study |
| pD- <i>sdhCAB</i>   | pD-SacB containing upstream and downstream of gene <i>sdhCAB</i>                                                                                                          | This study |

**Table S2.** Primers used in the construction of plasmids.

| Primers | DNA sequence (5' - 3')                           | Digest Sites |
|---------|--------------------------------------------------|--------------|
| pXPP-1  | cgtgaggtaccggtgtttctctggtacgacaacg               | <i>KpnI</i>  |
| pXPP-2  | cgtagttcatgcggtactccttgagatttgattg               |              |
| pXPP-3  | caaggagtacggcatgaactacgaagcctactccgtc            |              |
| pXPP-4  | ctacagaattcttaggcggctttgtagggccac                | <i>EcoRI</i> |
| pXPT-1  | gctccggtacctggccgttacctgcgaatgtccac              | <i>KpnI</i>  |
| pXPT-2  | ggaagtaggcttcgtagttcattgtatgtcctcctggacttcgtggtg |              |
| pXPT-3  | ccacgaagtccaggaggacatacaatgaactacgaagcctacttcc   |              |
| pXPT-4  | ctacagaattcttaggcggctttgtagggccac                | <i>EcoRI</i> |
| pXPG-1  | cgtgaggtaccgaatccattgtgcaccttagctactc            | <i>KpnI</i>  |
| pXPG-2  | tcgtagttcatcaggtcagctaacctttcacaagac             |              |
| pXPG-3  | gtagctgacctgatgaactacgaagcctacttcgctc            |              |
| pXPG-4  | ctacagaattcttaggcggctttgtagggccac                | <i>EcoRI</i> |
| pXPS-1  | cgtgaggtacctagctgccaattattccgggcttggtg           | <i>KpnI</i>  |
| pXPS-2  | gtaggcttcgtagttcatgggtaaaaatcctttcgtag           |              |
| pXPS-3  | cctacgaaaggatttttacccatgaactacgaagcctacttc       |              |
| pXPS-4  | ctacagaattcttaggcggctttgtagggccac                | <i>EcoRI</i> |

|                            |                                                                 |                |
|----------------------------|-----------------------------------------------------------------|----------------|
| NCgl0580-F                 | gcacgtctagaaaaggaggacaacccatgaataaacagtcgcgtgcag-<br>tggt       | <i>XbaI</i>    |
| NCgl0580-R                 | cgcgctctgcagggttaactaggtgtgtgtactcg                             | <i>SdaI</i>    |
| NCgl2065-F                 | gcacgtctagaaaaggaggacaacccgtgaatgatgtggtgaagac                  | <i>XbaI</i>    |
| NCgl2065-R                 | cgcgctctgcaggctaggagggcgctgcaaag                                | <i>SdaI</i>    |
| NCgl0581-F                 | gcacggagctcaaaggaggacaacccgtgctcaatctcaaccgttacac               | <i>SacI</i>    |
| NCgl0581-R                 | ctgcaggatcctcactctactagacgagcctcca                              | <i>BamHI</i>   |
| NCgl1445-F                 | gcacgggtaccaaaggaggacaacccatggcggtaccgcaagaac                   | <i>KpnI</i>    |
| NCgl1445-R                 | cgcgctctagattagtggttagctttctacccaaag                            | <i>XbaI</i>    |
| iolT1-F                    | gcacgggtaccaaaggaggacaacccatggctagtaccttcattcagg                | <i>KpnI</i>    |
| iolT1-R                    | cgcgctctgcagggttagtgacctttcttttcggatg                           | <i>SdaI</i>    |
| pyk2-F                     | gcacgtctagaaaaggaggacaacccatgcaggcccgctcaag                     | <i>XbaI</i>    |
| pyk2-R                     | cgcgctctgcagggttactctccagctcttcaccttg                           | <i>SdaI</i>    |
| aceA-F                     | gcacgtctagaaaaggaggacaacccatgtcaaacgttgaaagccac                 | <i>XbaI</i>    |
| aceA-R                     | cgcgctctgcaggctagtgttggaactggccttcttc                           | <i>SdaI</i>    |
| afuABC-F                   | gcacgggtaccaaaggaggacaacccatgtcttgaagcacccttg                   | <i>KpnI</i>    |
| afuABC-R                   | gctagcccggttaatccgcgcggtagaccatc                                | <i>SmaI</i>    |
| pstSCAB-F                  | gcacgggatccaaaggaggacaacccatgaacctcactcttaagcgctc               | <i>BamHI</i>   |
| pstSCAB-R                  | gcacgtctagattatccgaagcgccgagatg                                 | <i>XbaI</i>    |
| ugpQ-F                     | gcacggagctcaaaggaggacaacccatgaaagtcacgcgcaccgag                 | <i>SacI</i>    |
| ugpQ-R                     | gcacgggtacctagtcttcttgccatgcgca                                 | <i>KpnI</i>    |
| pD-NCgl0580-1              | gctagcccggtgactctactagacgagcctccaaataag                         | <i>SmaI</i>    |
| pD-NCgl0580-2              | ggtaagcctgcacggcccttgattattgcaaagaaac                           |                |
| pD-NCgl0580-3              | caaggccgctgcaggcttaccttttggaag                                  |                |
| pD-NCgl0580-4              | ctgcaggatcctggcatattgacgcctacaagtttg                            | <i>BamHI</i>   |
| pD-NCgl2065-1              | gctagcccggtgttcaagctcagtggggtgag                                | <i>SmaI</i>    |
| pD-NCgl2065-2              | gggtgtgggaaaccgatcacgacaccttactcagc                             |                |
| pD-NCgl2065-3              | gtgtcgtgatcgggttccacaccgccagtc                                  |                |
| pD-NCgl2065-4              | ctgcatctagaaagggtgtaggaacgagactcaatac                           | <i>XbaI</i>    |
| pD-NCgl0580TAA-1           | ctacaggatccgacggcgggcggaatgccggttcgagg                          | <i>BamHI</i>   |
| pD-NCgl0580TAA-2           | acagtcgcgtgcagtggtgatgaagtg-<br>taaatgtaagggtccgacctatccctgcaat |                |
| pD-NCgl0580TAA-3           | caaattgcagggataggcggaaccttacattacattacatcaacac-<br>tcagcggac    |                |
| pD-NCgl0580TAA-4           | cggtgtaagcttttaattgctggatgccctggcgcccttcct                      | <i>HindIII</i> |
| pD-NCgl0581-1              | gctagcccggttaactaggtgtgtgtactcgc                                | <i>SmaI</i>    |
| pD-NCgl0581-2              | gtactggcgcatgattgtctgaaggctcacaagaacgacacctcc                   |                |
| pD-NCgl0581-3              | gtaatactgaacaattttggaggtgtcgttctgtgagccttcagac                  |                |
| pD-NCgl0581-4              | gcggtcctgcaggctactccattcgatggttctctggtg                         | <i>SdaI</i>    |
| pD-NCgl0580-<br>NCgl0581-1 | gctagcccggtcttcaggagctgcacgcag                                  | <i>SmaI</i>    |
| pD-NCgl0580-<br>NCgl0581-2 | gcggtgcttttccagcagcgccatttggtg                                  |                |
| pD-NCgl0580-<br>NCgl0581-3 | cgctgctggaaaaagcaccgcggtcagggaagg                               |                |
| pD-NCgl0580-<br>NCgl0581-4 | ctgcaggatccccacggtggaaccttctggag                                | <i>BamHI</i>   |
| pD-sdhCAB-1                | ctgcatctagagcggcggtcaagggcac                                    | <i>XbaI</i>    |
| pD-sdhCAB-2                | cttgattaaagaggcacctccagtgctcgttg                                |                |
| pD-sdhCAB-3                | gaggtgcctcttaataccaagtaagtaccggttcagaca                         |                |
| pD-sdhCAB-4                | ctgcacctgcaggcttcaaagtagttcagggtgaggcac                         | <i>SdaI</i>    |
| pD-gdhA-1                  | gctagcccggtgcccgcgaaactgagga                                    | <i>SmaI</i>    |

|           |                                     |             |
|-----------|-------------------------------------|-------------|
| pD-gdhA-2 | cgcaggggtcgatttctcgttcccatctcggctg  |             |
| pD-gdhA-3 | cgaggaaatcgaccctgcgcttacttaaac      |             |
| pD-gdhA-4 | ctgcacctgcaggccggcaggcttgaaatcaactc | <i>SdaI</i> |

**Table S3.** Codon-optimized coding sequence of gene *hemA* from *Rhodopseudomonas palustris* (*hemARP*).

| Gene          | DNA sequence (5' - 3')                                                                                                                                                                                                                                                                                                                                                                                                                                                                                                                                                                                                                                                                                                                                                                                                                                                                                                                                                                                                                                                                                                                                                                                                                                                                                    |
|---------------|-----------------------------------------------------------------------------------------------------------------------------------------------------------------------------------------------------------------------------------------------------------------------------------------------------------------------------------------------------------------------------------------------------------------------------------------------------------------------------------------------------------------------------------------------------------------------------------------------------------------------------------------------------------------------------------------------------------------------------------------------------------------------------------------------------------------------------------------------------------------------------------------------------------------------------------------------------------------------------------------------------------------------------------------------------------------------------------------------------------------------------------------------------------------------------------------------------------------------------------------------------------------------------------------------------------|
| <i>hemARP</i> | atgaactacgaagcctacttccgtcgccagctggatggctgcatcggaaggccgctac-<br>cgtgtgttcgccgatctggaacgtcatgccggttccttcccacgcgcaaccatcacctccagaggggtgccggc<br>gacgtcacctgtggtgctccaacgattatctgggtatgggtcagcatccagcagtgtctgac-<br>cgccatgcacgaagcactggattctgccggcgccggtgccggtggcactcgtaacattgccggcaccaaccac<br>taccagtgctgctggagcaagaactcgagcactgcacggcaaggaatccgcac-<br>tctcttcacctcggctatgtctcaactgggctctctgtccactctggcatcccgcatgccgggtcgtgcatcc<br>tctccgacgaactgaatcacgcctccatgatcgaaggcatccgtcac-<br>tccgctctgaaaccgcacatttgcacacaacgatctcgcgatctggaacgtaagctcgagatctggatcctc<br>acgccccaaagctggctcgattcgagtcggtgtactccatggacggcga-<br>tctcgccccaatcgagaaatctgcgacgtggccgatgcacacaacgccatgacctatctggatgaggtccacg<br>gtgtcggcctctacggtccaaacggcggtggtatcgccgatcggaaggcatttccac-<br>cgtctgaccatcatcgaaggcactctggccaaggcattcgggtggtcggtggctacattgccggctcttcgcc<br>gtgtgcgacttcgtgctctcttgcctcggcttattcttctacctctctccac-<br>cagccgtggcagccggcgactggcctctatccgcatctccgcgatcctctgccgagcggaacgtcatcaa<br>gatcgctgcacgtctgcgcgcacgtctggatcaagccggcgtgg-<br>cacacatgccaaaccatctcacatctgccagtatggtcggtgacgcagccctctgcaaacagatctctgacg<br>agctcatctccgctatggcatctacgtgcagcctatcaactatccaaccgtgccaaaggg-<br>caccgagcgtctccgtatcactccatccccacaacacaccgacgccgatatcgaacacctcgtgcaagcactgtc<br>cgaaatctggactcgcgtgggctcgcaaaagccgcctaa |

**Table S4.** Primers used for RT-qPCR.

| Primers    | DNA sequence (5' - 3')  |
|------------|-------------------------|
| sdhA-U     | gcgtcatcgaccacatgaacg   |
| sdhA-D     | cggttgtccacgggtgtag     |
| afuA-U     | gggtcatgagctcgatgtcag   |
| afuA-D     | cgctacatcaacttctctgtgtc |
| hemB-U     | cccacgcactaattcgtcgtc   |
| hemB-D     | gagatctcacgtgcctcagt    |
| hemE-U     | cctgagtacaagaaggctccgtg |
| hemE-D     | gcatccacatcatgacgacga   |
| groES-U    | ggcaaccgttatcgagttg     |
| groES-D    | ccaccgaacttgatctcgggtg  |
| groL-U     | ccaacgacgggtgcaccattg   |
| groL-D     | gcagagttgagtcgtggtg     |
| NCgl0581-U | cgaagtgttgccctcagaaac   |
| NCgl0581-D | gaaggaggtgactttcagcggtc |
| gltA-U     | gctgtctgagactggactgatca |
| gltA-D     | gtggcattctcagccagatcag  |
| urtD-U     | cgtccacttctcatcggtg     |
| urtD-D     | gcacaggggttccagaatc     |
| sucA-U     | gcatgttcgggatcagctctg   |
| sucA-D     | gctaccctaacgctgaggaag   |
| cydB-U     | gcgttcagatatccaggctc    |
| cydB-D     | gcactgatcaaagaccgcgatg  |

|            |                          |
|------------|--------------------------|
| atpG-U     | gatcaccaaggctcaagagctca  |
| atpG-D     | cagcattgggtggtctaggag    |
| pfkA-U     | ccaccgtcgttggtatcaag     |
| pfkA-D     | ggccttaaactgtccgatgg     |
| NCgl1445-U | ccgatgtcgggaacagga       |
| NCgl1445-D | ctggcacattgttctcgctg     |
| hemH-U     | ctcgataacgcgttgagctct    |
| hemH-D     | gagctgatggaagaagccgaga   |
| acn-U      | cctatgactacttcgccctctctg |
| acn-D      | cctcaatgtgctcgttggtgatg  |
| gluD-U     | gccgtgttctcgggtgatctt    |
| gluD-D     | cggaaatggctcggaagtct     |
| gdhA-U     | ctctgcacaggtcttgaagatg   |
| gdhA-D     | ggagatgcagcagaacgcttc    |
| qcrB-U     | gcacggatgtcttctggatcag   |
| qcrB-D     | gccagttgatgacctgggtc     |
| ctaC-U     | ggagtcacggaagctgatgtac   |
| ctaC-D     | gctgtgcagaaatgtcggtac    |
| aceA-U     | gcagaccaggtagctgatctg    |
| aceA-D     | gccaagcgcgttgatgtatc     |
| sucD-U     | gcatgccccatggtcttctc     |
| sucD-D     | gtgagatcggtggagatgcag    |
| pstA-U     | catcagtgaagggaagcct      |
| pstA-D     | gcactgtccggtatcgtcac     |
| glk2-U     | gacagccctatcgagcagatcc   |
| glk2-D     | ccctctggtcccagaattacac   |
| pyk2-U     | ccttgatggcgtcgttgatg     |
| pyk2-D     | ccatctcgcgcagaaatcac     |
| hrrA-U     | ggatttcacgtggcttctg      |
| hrrA-D     | cccacgtgaactggaagttc     |
| hrrS-U     | cctgcccatacgagattccact   |
| hrrS-D     | gagccttcggaagtgtccagtac  |
| sfcA-U     | gcgacatgcgcgatcttctc     |
| sfcA-D     | cgcgacggtgtttccaatg      |

**Table S5.** The raw data of significant differentially expressed genes between JSD1 and JS.

Details in Excel Table S5

**Table S6.** The relative transcriptional level of genes in metabolic pathways of *C. glutamicum* JS and JSD1.

| Gene            | Product                                                  | log <sub>2</sub> FoldChange |         |
|-----------------|----------------------------------------------------------|-----------------------------|---------|
|                 |                                                          | RT-PCR                      | RNA-seq |
| <i>pyk2</i>     | pyruvate kinase                                          | 1.80                        | 2.42    |
| <i>pfkA</i>     | 6-phosphofructokinase                                    | 2.53                        | 1.62    |
| <i>glk2</i>     | glucokinase                                              | 1.16                        | 1.23    |
| <i>NCgl1445</i> | MFS transporter                                          | 2.12                        | 4.18    |
| <i>gltA</i>     | citrate synthase                                         | -0.38                       | -2.04   |
| <i>sucA</i>     | pyruvate and 2-oxoglutarate dehydrogenases, E1 component | -1.07                       | -0.82   |
| <i>acn</i>      | aconitate hydratase                                      | -1.24                       | -2.57   |
| <i>sucD</i>     | succinate-CoA ligase subunit alpha                       | 1.62                        | 1.71    |

|                 |                                                                 |       |       |
|-----------------|-----------------------------------------------------------------|-------|-------|
| <i>aceA</i>     | isocitrate lyase                                                | 0.79  | 1.94  |
| <i>sfcA</i>     | NADP-dependent malic enzyme                                     | 1.27  | 1.40  |
| <i>hemB</i>     | prophobilinogen synthase                                        | -0.49 | -0.41 |
| <i>hemE</i>     | uroporphyrinogen decarboxylase                                  | -0.69 | -2.14 |
| <i>hemH</i>     | ferrochelatase                                                  | 0.52  | -0.86 |
| <i>gdhA</i>     | NADP-specific glutamate dehydrogenase                           | -1.46 | -2.21 |
| <i>hrrS</i>     | sensor histidine kinase                                         | -2.30 | -1.11 |
| <i>hrrA</i>     | response regulator transcription factor                         | 0.41  | 1.95  |
| <i>groES</i>    | co-chaperone                                                    | 2.27  | 2.59  |
| <i>groL</i>     | chaperonin                                                      | 1.88  | 1.43  |
| <i>NCgl0581</i> | LysR substrate-binding domain-containing protein                | 4.07  | 6.92  |
| <i>atpG</i>     | F0F1 ATP synthase subunit gamma                                 | -0.58 | -1.10 |
| <i>qcrB</i>     | cytochrome bc1 complex cytochrome b subunit                     | -2.26 | -2.20 |
| <i>ctaC</i>     | cytochrome c oxidase subunit II                                 | -1.41 | -2.22 |
| <i>cydB</i>     | cytochrome d ubiquinol oxidase subunit II                       | -2.91 | -4.84 |
| <i>sdhA</i>     | fumarate reductase/succinate dehydrogenase flavoprotein subunit | -3.32 | -3.99 |
| <i>afuA</i>     | ABC transporter substrate-binding protein                       | 2.35  | 4.48  |
| <i>pstA</i>     | phosphate ABC transporter permease                              | 3.76  | 3.95  |
| <i>gluD</i>     | amino acid ABC transporter permease                             | -1.70 | -1.12 |
| <i>urtD</i>     | urea ABC transporter ATP-binding protein                        | -5.17 | -7.44 |

**Table S7.** The raw data of pathway enrichment analysis of the differentially expressed genes between JSD1 and JS.

Details in Excel Table S7

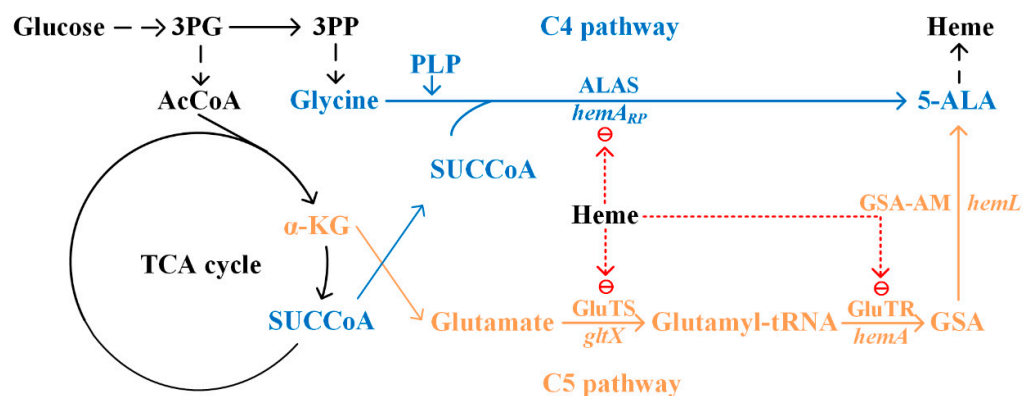

**Figure S1.** An overall metabolic pathway for 5-ALA biosynthesis. The blue font and lines represent the C4 pathway. The orange font and lines represent the C5 pathway. The dashed black line indicates several continuously enzymatic reactions, and the dashed red line indicates feedback inhibition. 3PG, 3-phosphoglycerate; α-KG, α-oxoglutarate; SUCCoA, Succinyl-CoA; PLP, Pyridoxal 5'-phosphate; GluTS, glutamyl-tRNA synthetase; GluTR, glutamyl-tRNA reductase; GSA, glutamate-1-semialdehyde; GSA-AM, glutamate-1-semialdehyde aminotransferase.

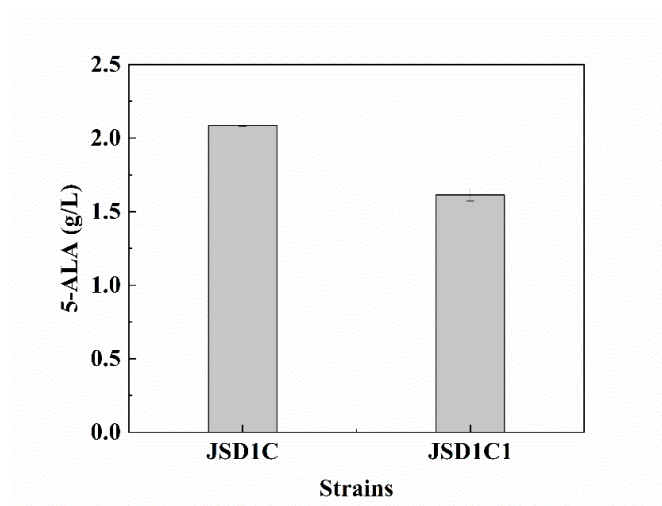

**Figure S2.** Effect of plasmid-based *NCgl0580* overexpression in JSD1 strain on 5-ALA biosynthesis. JSD1C1 is the strain overexpressing *NCgl0580* compared with the JSD1C strain (JSD1 harboring pEC-XK99E).

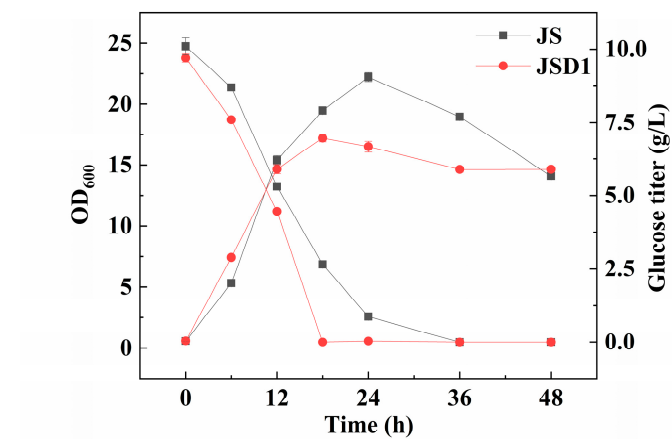

**Figure S3.** Determination of cell growth and sugar consumption of strains JS and JSD1.
